# Supplementary material for: Lignan-Rich Sesame (Sesamum indicum L.) Cultivar Exhibits In Vitro Anti-Cholinesterase Activity, Anti-Neurotoxicity in Amyloid-β Induced SH-SY5Y Cells, and Produces an In Vivo Nootropic Effect in Scopolamine-Induced Memory Impaired Mice
Source: MDPI journal article supplement (doi:10.3390/antiox12051110), 2023-05-17
Supplement: s1 [file s1]

# Lignan-rich sesame (*Sesamum indicum* L.) cultivar exhibits *in vitro* anti-cholinesterase activity, anti-neurotoxicity in amyloid- $\beta$ induced SH-SY5Y cells, and produces an *in vivo* nootropic effect in scopolamine-induced memory impaired mice

Min Young Kim<sup>1\*</sup>, Sungup Kim<sup>1</sup>, Jeongeun Lee<sup>1</sup>, Jung In Kim<sup>1</sup>, Eunyong Oh<sup>1</sup>, Sang Woo Kim<sup>1</sup>, Eunsoo Lee<sup>1</sup>, Kwang Soo Cho<sup>1</sup>, Myoung Hee Lee<sup>1</sup>

## Supplementary Materials

**Supplementary Table S1.** Total polyphenol content, total flavonoid content, and sesame lignan composition in different sesame varieties.

**Supplementary Table S2.** Antioxidant activities and enzyme inhibitory activities of different sesame varieties.

**Supplementary Table S3.** *In vivo* experimental design.

**Supplementary Table S4.** Body weight (g), tissue weight (g), and serum biochemistry analysis.

**Table S1.** Total polyphenol content, total flavonoid content, sesame lignan composition of different sesame varieties.

| Varieties  | <sup>1)</sup> TPC      | <sup>2)</sup> TFC      | Lignan content(mg/g sample) |                        |                        |                        |                        | Total                   |
|------------|------------------------|------------------------|-----------------------------|------------------------|------------------------|------------------------|------------------------|-------------------------|
|            | (mg GAE/g sample)      | (mg CE/g Sample)       | Sesamin                     | Sesamolin              | Sesaminol              | Sesaminol-diglucoside  | Sesaminol-triglucoside |                         |
| Goenback   | 1.48±0.03 <sup>d</sup> | 0.59±0.02 <sup>e</sup> | 2.33±0.07 <sup>e</sup>      | 1.69±0.01 <sup>e</sup> | 0.02±0.00 <sup>h</sup> | 0.12±0.00 <sup>g</sup> | 0.82±0.01 <sup>f</sup> | 4.98±0.08 <sup>fg</sup> |
| Ansan      | 1.28±0.03 <sup>f</sup> | 0.79±0.01 <sup>d</sup> | 4.65±0.10 <sup>c</sup>      | 2.24±0.04 <sup>c</sup> | 0.04±0.00 <sup>b</sup> | 0.34±0.01 <sup>b</sup> | 2.03±0.07 <sup>c</sup> | 9.30±0.13 <sup>d</sup>  |
| Koppom     | 1.41±0.02 <sup>e</sup> | 0.76±0.02 <sup>d</sup> | 5.30±0.07 <sup>b</sup>      | 2.79±0.03 <sup>b</sup> | 0.04±0.00 <sup>c</sup> | 0.31±0.00 <sup>c</sup> | 1.90±0.03 <sup>d</sup> | 10.34±0.09 <sup>c</sup> |
| Daheuk     | 0.85±0.04 <sup>h</sup> | 0.36±0.01 <sup>f</sup> | 1.25±0.07 <sup>f</sup>      | 1.19±0.06 <sup>g</sup> | 0.02±0.00 <sup>g</sup> | 0.19±0.01 <sup>e</sup> | 1.24±0.02 <sup>e</sup> | 3.90±0.10 <sup>g</sup>  |
| Miryang 68 | 1.72±0.02 <sup>c</sup> | 1.67±0.17 <sup>a</sup> | 2.65±0.13 <sup>d</sup>      | 1.98±0.03 <sup>d</sup> | 0.02±0.00 <sup>f</sup> | 0.13±0.00 <sup>g</sup> | 0.65±0.01 <sup>g</sup> | 5.44±0.15 <sup>f</sup>  |
| Miryang 69 | 1.00±0.03 <sup>g</sup> | 0.58±0.01 <sup>e</sup> | 2.83±0.10 <sup>d</sup>      | 1.50±0.02 <sup>f</sup> | 0.03±0.00 <sup>d</sup> | 0.21±0.02 <sup>e</sup> | 0.90±0.04 <sup>f</sup> | 5.47±0.10 <sup>f</sup>  |
| Miryang 70 | 0.76±0.01 <sup>i</sup> | 0.32±0.02 <sup>f</sup> | 2.46±0.07 <sup>e</sup>      | 1.43±0.01 <sup>f</sup> | 0.02±0.00 <sup>e</sup> | 0.18±0.01 <sup>f</sup> | 1.27±0.04 <sup>e</sup> | 5.35±0.10 <sup>f</sup>  |
| Miryang 72 | 0.66±0.01 <sup>j</sup> | 0.17±0.02 <sup>g</sup> | 2.84±0.10 <sup>d</sup>      | 1.68±0.03 <sup>e</sup> | 0.03±0.00 <sup>e</sup> | 0.27±0.00 <sup>d</sup> | 2.56±0.00 <sup>b</sup> | 7.38±0.13 <sup>e</sup>  |
| Miryang 73 | 2.39±0.04 <sup>a</sup> | 1.04±0.05 <sup>c</sup> | 10.25±0.51 <sup>a</sup>     | 3.58±0.19 <sup>a</sup> | 0.04±0.00 <sup>b</sup> | 0.35±0.01 <sup>b</sup> | 2.61±0.09 <sup>b</sup> | 16.83±0.61 <sup>b</sup> |
| Miryang 74 | 2.31±0.03 <sup>b</sup> | 1.22±0.04 <sup>b</sup> | 10.08±0.14 <sup>a</sup>     | 3.47±0.16 <sup>a</sup> | 0.06±0.00 <sup>a</sup> | 0.59±0.01 <sup>a</sup> | 3.50±0.07 <sup>a</sup> | 17.71±0.32 <sup>a</sup> |

Values are mean ± SD of three replicates. Different small letters in the same items indicate a significant difference ( $p < 0.05$ ) among varieties.

<sup>1)</sup>Total polyphenol content(mg gallic acid equivalent/g sample)

<sup>2)</sup>Total flavonoid content(mg catechin equivalent/g sample)

**Table S2.** Antioxidant activities and Enzyme inhibitory activities of different sesame varieties.

| varieties  | Antioxidant activities(mg TE/g sample) |                        | Enzyme inhibitory activities(%)   |                                 |                                 |                                 |
|------------|----------------------------------------|------------------------|-----------------------------------|---------------------------------|---------------------------------|---------------------------------|
|            | <sup>1)</sup> ABTS                     | <sup>2)</sup> DPPH     | <sup>3)</sup> AChE<br>(0.4 mg/mL) | <sup>4)</sup> BChE<br>(2 mg/mL) | <sup>5)</sup> ACE<br>(10 mg/mL) | <sup>6)</sup> AG<br>(2.5 mg/mL) |
| Goenback   | 3.55±0.05 <sup>c</sup>                 | 2.17±0.31 <sup>c</sup> | 32.49±1.21 <sup>g</sup>           | 16.40±0.03 <sup>f</sup>         | 25.33±7.90 <sup>ab</sup>        | 53.56±3.10 <sup>e</sup>         |
| Ansan      | 2.54±0.07 <sup>f</sup>                 | 1.94±0.31 <sup>c</sup> | 37.17±0.98 <sup>f</sup>           | 12.90±0.06 <sup>g</sup>         | 18.62±0.91 <sup>b</sup>         | 84.38±1.18 <sup>a</sup>         |
| Koppom     | 3.05±0.09 <sup>d</sup>                 | 2.06±0.25 <sup>c</sup> | 32.47±2.48 <sup>g</sup>           | 14.60±0.18 <sup>h</sup>         | 18.06±4.48 <sup>b</sup>         | 82.18±1.43 <sup>ab</sup>        |
| Daheuk     | 2.68±0.02 <sup>e</sup>                 | 2.50±0.15 <sup>b</sup> | 30.47±3.07 <sup>h</sup>           | 20.80±0.34 <sup>e</sup>         | 30.24±5.43 <sup>a</sup>         | 53.05±2.83 <sup>e</sup>         |
| Miryang 68 | 3.93±0.03 <sup>b</sup>                 | 2.58±0.20 <sup>b</sup> | 37.15±1.26 <sup>f</sup>           | 26.70±0.16 <sup>d</sup>         | 18.41±2.97 <sup>b</sup>         | 56.12±2.44 <sup>e</sup>         |
| Miryang 69 | 2.20±0.05 <sup>g</sup>                 | 1.63±0.07 <sup>d</sup> | 43.57±1.79 <sup>c</sup>           | 21.16±0.70 <sup>e</sup>         | 29.67±4.06 <sup>a</sup>         | 60.32±2.20 <sup>d</sup>         |
| Miryang 70 | 1.85±0.10 <sup>h</sup>                 | 1.29±0.04 <sup>e</sup> | 40.12±2.02 <sup>e</sup>           | 27.58±0.55 <sup>d</sup>         | 28.27±1.92 <sup>a</sup>         | 78.33±2.12 <sup>b</sup>         |
| Miryang 72 | 1.61±0.10 <sup>i</sup>                 | 1.15±0.04 <sup>e</sup> | 41.78±0.90 <sup>d</sup>           | 32.19±0.64 <sup>c</sup>         | 27.75±8.71 <sup>a</sup>         | 79.25±3.18 <sup>b</sup>         |
| Miryang 73 | 5.19±0.07 <sup>a</sup>                 | 2.98±0.09 <sup>a</sup> | 61.49±2.56 <sup>b</sup>           | 38.70±0.97 <sup>a</sup>         | 26.31±0.31 <sup>ab</sup>        | 45.84±3.50 <sup>f</sup>         |
| Miryang 74 | 5.28±0.08 <sup>a</sup>                 | 2.98±0.08 <sup>a</sup> | 66.17±3.13 <sup>a</sup>           | 36.40±0.11 <sup>b</sup>         | 29.11±1.08 <sup>a</sup>         | 67.63±2.54 <sup>c</sup>         |

Values are mean ± SD of three replicates. Different small letters in the same items indicate a significant difference ( $p < 0.05$ ) among varieties.

<sup>1)</sup>ABTS radical scavenging activity(mg trolox equivalent/g sample)

<sup>2)</sup>DPPH radical scavenging activity(mg trolox equivalent/g sample)

<sup>3)</sup>Acetylcholinesterase inhibitory activity(%)

<sup>4)</sup>Butylcholinesterase inhibitory activity(%)

<sup>5)</sup>Angiotensin converting enzyme inhibitory activity(%)

<sup>6)</sup> $\alpha$ -glucosidase inhibitory activity(%)

**Table S3.** *In vivo* Experimental design

| No. | Group | Mice | Memory Impairment<br>(Scopolamine, 2 mg/kg) | Sample concentration |
|-----|-------|------|---------------------------------------------|----------------------|
| 1   | N     | 7    | -                                           | 0.9 % NaCl           |
| 2   | C     | 7    | +                                           | 0.9 % NaCl           |
| 3   | P     | 7    | +                                           | 0.75 mg/kg           |
| 4   | GBE   | 7    | +                                           | 250 mg/kg            |
| 5   |       | 7    | +                                           | 500 mg/kg            |
| 6   | GBO   | 7    | +                                           | 1 mL/kg              |
| 7   |       | 7    | +                                           | 2 mL/kg              |
| 8   | M74E  | 7    | +                                           | 250 mg/kg            |
| 9   |       | 7    | +                                           | 500 mg/kg            |
| 10  | M74O  | 7    | +                                           | 1 mL/kg              |
| 11  |       | 7    | +                                           | 2 mL/kg              |

N: Normal, C: Control, P: Donepezil, GBE: Goenbaek extract, GBO: Goenbeak oil, M74E: M74 extract, M74O: M74 Oil

**Table S4.** Body weight(g), Tissue weight(g), serum biochemistry analysis

| Group |           | Body weight (g)             |               | Tissue weight(g) |              |                            |                            | Enzyme activities in serum(U/L) |                            |
|-------|-----------|-----------------------------|---------------|------------------|--------------|----------------------------|----------------------------|---------------------------------|----------------------------|
|       |           | Initial                     | 4 week        | Liver            | Kidney       | Spleen                     | Brain                      | GOT                             | GPT                        |
|       | N         | 29.52 ± 1.08 <sup>n.s</sup> | 37.16 ± 1.58  | 2.26 ± 0.19      | 0.65 ± 0.08  | 0.14 ± 0.02 <sup>n.s</sup> | 0.48 ± 0.03 <sup>n.s</sup> | 67.26 ± 8.03 <sup>†</sup>       | 37.58 ± 7.04 <sup>#</sup>  |
|       | C         | 29.54 ± 0.84                | 35.59 ± 1.31  | 2.14 ± 0.26      | 0.66 ± 0.09  | 0.12 ± 0.01                | 0.48 ± 0.03                | 101.81 ± 22.80                  | 52.73 ± 10.16              |
|       | P         | 29.50 ± 1.30                | 33.60 ± 0.95  | 2.08 ± 0.09      | 0.65 ± 0.06  | 0.11 ± 0.01                | 0.47 ± 0.03                | 70.59 ± 16.02 <sup>†</sup>      | 35.94 ± 7.30 <sup>#</sup>  |
| GBE   | 250 mg/kg | 29.61 ± 1.08                | 33.57 ± 1.40  | 2.16 ± 0.18      | 0.64 ± 0.08* | 0.14 ± 0.02                | 0.48 ± 0.08                | 60.86 ± 2.45 <sup>†</sup>       | 36.67 ± 1.91 <sup>#</sup>  |
|       | 500 mg/kg | 29.53 ± 1.23                | 33.57 ± 2.27  | 2.18 ± 0.18      | 0.68 ± 0.04  | 0.11 ± 0.01                | 0.49 ± 0.03                | 69.99 ± 6.20 <sup>†</sup>       | 37.06 ± 3.72 <sup>#</sup>  |
| GBO   | 1 mL/kg   | 29.46 ± 1.23                | 33.97 ± 1.50  | 1.96 ± 0.21      | 0.64 ± 0.05  | 0.12 ± 0.01                | 0.48 ± 0.02                | 55.93 ± 10.67 <sup>†</sup>      | 32.33 ± 7.84 <sup>†</sup>  |
|       | 2 mL/kg   | 29.49 ± 0.75                | 33.35 ± 0.98* | 1.88 ± 0.19*     | 0.62 ± 0.09  | 0.11 ± 0.02                | 0.49 ± 0.02                | 60.72 ± 8.68 <sup>†</sup>       | 25.80 ± 6.85 <sup>†</sup>  |
| M74E  | 250 mg/kg | 29.46 ± 0.97                | 35.44 ± 2.21  | 2.19 ± 0.18      | 0.66 ± 0.07  | 0.13 ± 0.02                | 0.48 ± 0.03                | 66.28 ± 9.44 <sup>†</sup>       | 38.61 ± 9.99 <sup>#</sup>  |
|       | 500 mg/kg | 29.64 ± 0.95                | 34.44 ± 1.65  | 2.21 ± 0.26      | 0.72 ± 0.06  | 0.12 ± 0.02                | 0.49 ± 0.01                | 54.09 ± 8.76 <sup>†</sup>       | 28.89 ± 2.67 <sup>†</sup>  |
| M74O  | 1 mL/kg   | 29.64 ± 0.91                | 33.68 ± 1.79* | 2.01 ± 0.21      | 0.64 ± 0.10  | 0.12 ± 0.02                | 0.47 ± 0.02                | 62.57 ± 12.64 <sup>†</sup>      | 31.59 ± 14.83 <sup>†</sup> |
|       | 2 mL/kg   | 29.48 ± 0.98                | 33.33 ± 1.62* | 1.88 ± 0.17*     | 0.60 ± 0.05  | 0.12 ± 0.02                | 0.47 ± 0.03                | 66.95 ± 7.09 <sup>†</sup>       | 29.65 ± 6.16 <sup>†</sup>  |
